## 1 **PIME: a package for discovery of novel differences among microbial communities**

2  
3 Luiz Fernando W. Roesch<sup>1</sup>, Priscila Thiago Dobbler<sup>1</sup>, Victor Satler Pylro<sup>2</sup>, Bryan Kolaczkowski<sup>3</sup>,  
4 Jennifer C. Drew<sup>3</sup> and Eric W. Triplett<sup>3</sup>

5  
6 <sup>1</sup>Interdisciplinary Research Center on Biotechnology-CIP-Biotec, Universidade Federal do Pampa, São  
7 Gabriel, Rio Grande do Sul, Brazil.

8 <sup>2</sup>Microbial Ecology and Bioinformatics Lab., Department of Biology, Universidade Federal de Lavras, MG,  
9 Brazil.

10 <sup>3</sup>Department of Microbiology and Cell Science, Institute of Food and Agricultural Sciences, University of  
11 Florida, Gainesville, FL, USA.

### 12 13 **Abstract**

14  
15 Massive sequencing of genetic markers, such as the 16S rRNA gene for prokaryotes, allows the  
16 comparative analysis of diversity and abundance of whole microbial communities. However, the  
17 data used for profiling microbial communities is usually low in signal and high in noise  
18 preventing the identification of real differences among treatments. PIME (Prevalence Interval for  
19 Microbiome Evaluation) fills this gap by removing those taxa that may be high in relative  
20 abundance in just a few samples but have a low prevalence overall. The reliability and  
21 robustness of PIME were compare against the existing methods and verified by a number of  
22 approaches using 16S rRNA independent datasets. To remove the noise, PIME filters microbial  
23 taxa not shared in a per treatment prevalence interval starting at 5% with increments of 5% at  
24 each filtering step. For each prevalence interval, hundreds of decision trees are calculated to  
25 predict the likelihood of detecting differences in treatments. The best prevalence-filtered dataset  
26 is user-selected by choosing the prevalence interval that keeps the majority of the 16S rRNA  
27 reads in the dataset and shows the lowest error rate. To obtain the likelihood of introducing bias  
28 while building prevalence-filtered datasets, an error detection step based in random  
29 permutations is also included. A reanalysis of previews published datasets with PIME  
30 uncovered previously missed microbial associations improving the ability to detect important  
31 organisms, which may be masked when only relative abundance is considered.

## 1 INTRODUCTION

2

3 Sequencing of amplified genetic markers (metataxonomics), e.g. the 16S rRNA gene, is  
4 traditionally used for testing hypotheses based on microbial community composition. Taxonomic  
5 differences among treatments or outcomes in microbiome surveys have changed our  
6 understanding of the role played by microorganisms in the environment, plant and animal hosts,  
7 including humans. The major challenge for using this information is their interpretation for the  
8 discovery of the drivers of microbial diversity, the main taxa related to a given factor and the  
9 reduction in false discovery rates. Generally, as microbiome studies present a large number of  
10 taxa that are low in prevalence in many of the samples (1), these approaches frequently include  
11 a variety of pre-filtering steps. Those steps include, but are not limited, to the exclusion of  
12 sequences and/or taxonomic unities with low abundance, low variation, or low presence across  
13 all samples. Moreover, removing arguably uninformative information, pre-filtering is also  
14 advantageous because low abundance features in metataxonomic surveys might be also due to  
15 sequencing errors or low level of contaminants from commercial kits (2, 3).

16 Besides filtering low abundance sequences, a frequent approach involves the exclusion  
17 of microbial taxa under low prevalence across all samples. The prevalence of microbes in the  
18 human microbiome is characterized by variable distribution patterns (4) with prominent  
19 abundance of some strains in some subjects and nearly absence in others. While this unusual  
20 distribution might be focus of research for future experimental study (4), identify microbial  
21 taxonomic unities present in the majority of the subjects, also known as microbial core, has  
22 been one of the primary goals of the Human Microbiome Project (5, 6). The central objective of  
23 obtaining a healthy core microbiome is to use it to identify significant deviations from normality  
24 that might be associated with disease states, for example.

25 Many tools such as DADA2 (7), Phyloseq (8), Qiime (9), UPARSE (10), MG-RAST (11),  
26 mothur (12), MicrobiomeAnalyst (13) among others, have been developed to contrast  
27 experimental factors in microbiome studies. The choice of a given analyses package is usually  
28 based on the user's level of experience in bioinformatics and on the available resources at the  
29 user's host institution (14), but unfortunately, the most used approaches embedded in these  
30 packages rarely consider microbial prevalence.

31 Based on the microbial core concept, here we propose a new workflow designed to  
32 identify and remove the within group variation found in metataxonomic surveys (16S rRNA  
33 datasets) by capturing only biological differences at high sample prevalence levels. That means  
34 in an experiment comparing two treatments (e.g. health against diseased subjects) one core for

1 each treatment will be calculated and relevant microbial taxa responsible for differences within  
2 microbial cores will be detected. To implement this concept, we developed an R package called  
3 PIME (Prevalence Interval for Microbiome Evaluation). PIME is a tool specifically designed to  
4 work with datasets presenting high variations among samples. It removes per group microbial  
5 taxa to keep only those taxa that are shared at some level of prevalence, using a machine  
6 learning algorithm. For each prevalence level a list with the most relevant taxa responsible for  
7 differences between or among groups is provided. To obtain the likelihood of introducing bias  
8 while building prevalence-filtered datasets, an error detection step based on randomizations is  
9 also included.

10

11

## 12 **PROGRAM DESCRIPTION AND METHODS**

### 13 **Bioinformatics Workflow**

14 The bioinformatics workflow described here is embedded into an R package called PIME  
15 (Prevalence Intervals for Microbiome Evaluation) available at:  
16 <https://github.com/microEcology/PIME>. PIME identifies statistically significant bacterial  
17 community differences taking into account the proportion of samples hosting a specific microbial  
18 community in a given time period. For the purpose of this work, prevalence was defined as the  
19 proportion of individuals in a specific group who share taxa, irrespective of the abundance, at  
20 the time of sampling. That is, a prevalence cutoff of 50% means that the taxa selected at this  
21 prevalence interval are found in 50% of subjects. PIME's strategy is based on four fundamental  
22 steps depicted in Figure 1 and explained below:

23

#### 24 *1) Prediction of differences on full dataset:*

25 PIME takes a phyloseq object (8) as input, builds hundreds of decision trees using a  
26 supervised machine learning algorithm and combines them into a single model to predict the  
27 likelihood of detecting any user predefined factor (e.g. difference between treatments) as source  
28 of sample variation (15). The model performance is indicated by the out-of-bag (OOB) estimate  
29 of the error rate calculated by training the algorithm on a subset of samples and tested on the  
30 remaining samples. Values can vary from 0 to 1, where zero indicates the model has 100%  
31 accuracy and 1 that the model has zero accuracy. This overall measurement of accuracy can be  
32 interpreted as an estimate of error obtained when the model is applied to new observations.  
33 Higher OOB error indicates low accuracy of the model in predicting differences among the

1 variables tested. In this case, PIME might be used as an alternative to reduce noise by  
2 removing microbial taxa with low prevalence among samples. This might help to improve the  
3 model accuracy. This first step using the full dataset is implemented in a function called  
4 *pime.oob.error*. This function is run using the dataset without any filtering proposed by PIME.  
5 After obtaining the OOB error rate, the user should decide whether or not running PIME is  
6 adequate to the dataset. For instance, an OOB error close to zero indicates the prevalence  
7 filtering with PIME is not necessary, as the model accuracy is already reasonably good. On the  
8 other hand, if OOB error rate is greater than zero, filtering the dataset using PIME might  
9 improve the model accuracy. The user might then run the next function called  
10 *pime.split.by.variable*, which is described below.

11

12 *II) Split the dataset by predictor variable and compute prevalence intervals:*

13 The full dataset is split according to treatments (or variables) defined by the user in the  
14 metadata file. PIME can deal with two or more variables. Each variable will be used to define  
15 data subsets. Those per variable subsets will be filtered using different prevalence levels from  
16 5% up to 95% with increments of 5% for each level (see Figure 1 for a simplified schema  
17 illustrating this filtering step). Prevalence levels (usually high prevalence levels – e.g. 90%)  
18 where samples have zero counts are not calculated. After removal of taxa that did not match the  
19 prevalence criteria, the subsets are merged to compose a new filtered dataset (one per  
20 prevalence interval) used in the downstream analysis. This step is implemented in two functions  
21 called: *pime.split.by.variable* and *pime.prevalence*. The *pime.split.by.variable* function uses the  
22 original dataset as input and its output is used as input to the *pime.prevalence*. The function  
23 *pime.prevalence* keeps, for each treatment group, every OTU/ASV according to the following  
24 logical equation:

25

$$26 \quad N_0/N_s > P_i == True$$

27

28 *Where:  $N_0$  is the number of OTUs/ASVs with  $Sum>0$ ,  $N_s$  is the number of samples and*  
29  *$P_i$  is the prevalence interval  $P_i=0.05, \dots, P_{max}$ .*

30

1            *III) Computation of OOB error on each prevalence interval and importance of each taxa*  
2            *to differentiate microbial communities*

3            At this step Random Forests analysis (15) is used to determine the level of prevalence  
4            that provides the best model to predict differences in the communities while still including as  
5            many taxa as possible in the analysis. The approach uses multiple learning algorithms to run  
6            classifications based on decision trees. After prevalence filtering, for each prevalence interval  
7            the OOB error rate, the number of remaining taxa and sequences is calculated. The results are  
8            provided in a table that can be used to decide the best prevalence interval that provides a  
9            classification model with reasonably good accuracy. This step is implemented in a function  
10           called: *pime.best.prevalence*. Within the same function, the contribution of each taxa to the  
11           mean decrease in classification accuracy is calculated. High values of mean decrease accuracy  
12           indicate the importance of taxa to differentiate two or more microbial communities. The user can  
13           access the importance of taxa in each of the prevalence interval calculated.

14

15           *IV) Validation*

16           To obtain the likelihood of introducing bias while building prevalence-filtered datasets, an  
17           error detection step is also included under the following rationale: Consider the scenario in  
18           which the null hypothesis of “no difference between groups” is false. If we randomly shuffle the  
19           labels that identify the sample groups and run the test again the expected outcome is that the  
20           randomized dataset will have a small chance to present distinct groups. Running the test  
21           multiple times with the random dataset would produce a high OOB error rate in most cases.  
22           This error detection test is implemented in two functions called *pime.error.prediction* and  
23           *pime.oob.replicate*. The first function randomizes the samples labels into arbitrary groupings  
24           using 100 random permutations. For each randomized prevalence filtered dataset, the OOB  
25           error rate is calculated to determine whether differences in the original groups occur by chance.  
26           The second function performs the Random Forest analyses and computes the OOB error for  
27           100 replications in each prevalence interval without randomizing the sample labels. The  
28           biological difference among samples is expected to be greater than the differences generated  
29           randomly. Thus, the greatest fraction of randomizations should generate high error rates. On the  
30           other hand, no improvement in accuracy is expected within the randomized dataset.

31

1

## 2 **Empirical Validation**

3         The PIME workflow was compared against other existing filtering methods and by using  
4 empirical tests with 16S rDNA datasets. The performance of PIME was compared against  
5 filtering methods based on overall prevalence, low abundance and low variance. Also, four 16S  
6 rDNA datasets were analyzed using PIME to illustrate its usefulness. These include an  
7 assessment of: a) the association between diet and saliva microbiome composition  
8 (unpublished original research); b) the gut microbiome in subjects at high genetic risk for type 1  
9 diabetes (16); c) the vaginal microbiome in pregnant women randomized to receive milk with or  
10 without probiotic bacterial strains (17); and d) the saliva microbiome compared the left  
11 antecubital fossa of healthy individuals (Human Microbiome Consortium, 2012).

12         The 16S rRNA gene sequences generated in this work have been deposited in NCBI's  
13 Short Read Archive and are accessible through BioProject ID PRJNA504439.

14

15

### 16 *Comparison with other existing filtering methods*

17         Comparisons were performed using a dataset composed by 16S rRNA sequences from  
18 microbes extracted from saliva of 125 undergraduate and graduate students from the University  
19 of Florida (accessible through BioProject ID PRJNA504439). The following filtering tests were  
20 performed: a) filtering the dataset by overall prevalence. To be kept, taxa must be present in at  
21 least 20% of the subjects; b) filtering the dataset by abundance. To be kept, taxa must have at  
22 least 5 sequences; c) filtering by low variance. To be kept taxa must have variance higher than  
23 20%. Filtered datasets were compared against the prevalence interval of 65% as calculated by  
24 PIME as the best prevalence interval where the OOB error was zero. A record of this analysis  
25 containing a step-by-step R-code and results is provided in the Supplementary File S1.

26

27

### 28 **Performance evaluation with 16S rRNA datasets**

29         A novel and three published datasets were analyzed with PIME. The novel dataset used  
30 in this work comprised of 16S rRNA gene sequences from saliva samples obtained from 125

1 undergraduate and graduate students from the University of Florida. The study assessed the  
2 subject's diet as a factor influencing the saliva microbiome. This study was approved by the  
3 University of Florida's Institutional Review Board and assigned number IRB201602134.  
4 Approximately 224 undergraduate and graduate students taking three courses were invited to  
5 anonymously participate in this study as volunteers. A study coordinator was chosen to collect  
6 samples and code the samples so that those who did the analysis were unaware of the identity  
7 of the volunteers. To assess the diet, the subjects also completed the KIDMED survey (18). The  
8 sampling collection, DNA extraction and library preparation are described below.

9

10

### 11 *Sampling collection, DNA extraction and library preparation*

12 Of the 224 students invited, 125 volunteers obtained the saliva sample collection and  
13 provided 2 ml of saliva. The samples were taken from each subject using the GeneFix™ Saliva  
14 DNA Collection device. The collection kit allows immediate stabilization of the DNA. Total DNA  
15 was extracted using the GeneFix™ Saliva-prep-2 kit (Cell Projects Ltd, Harrietsham, UK)  
16 following the manufacturer's protocol. DNA samples were stored at -20 °C until use.

17 To assess the diet, the subjects also completed the KIDMED survey (18). The KIDMED  
18 Index is based on a series of 16 questions, which measures the degree to which a subject  
19 adheres to the Mediterranean diet. The KIDMED index has been validated with nutritional data  
20 (19) and was much simpler to implement than a diet diary or a serum-based nutrition analysis.  
21 Participant's age and gender were also obtained.

22 The 16S rRNA library preparation was performed as described previously (16) and  
23 sequenced with Illumina MiSeq: 2x300 cycles run. The raw fastq files were used to build a table  
24 of exact amplicon sequence variants (ASVs) with DADA2 version 1.8 (7). Taxonomy was  
25 assigned to each ASV using the SILVA ribosomal RNA gene database version v132 (20). A  
26 detailed R script containing the code used to generate the ASV table is provided in the  
27 Supplementary File S2. Downstream analyses were carried out using a rarefied dataset of  
28 24,900 sequences as previously recommended by Lemos et al. (21).

29

30

### 31 *Description of the previously published datasets*



1           The first previously published dataset used here was described by Davis-Richardson et  
2 al. (16) and comprised of partial 16S rDNA sequences from fecal samples of 76 subjects born  
3 between 1996 and 2007 at the Turku University Hospital in southwestern Finland. All subjects  
4 were at high genetic risk for type 1 diabetes. The cohort was retroactively selected to create an  
5 age-matched genotype-controlled set of subjects for the investigation of the microbiome as an  
6 environmental factor influencing the development of Type-1 diabetes. The raw Fastq files were  
7 obtained and sequences were processed using DADA2 version 1.8 (7), as described above.  
8 Cases were defined as subjects who developed at least two persistent islet cell autoantibody  
9 (ICA), IAA, GADA, or IA-2A. Controls were defined as subjects with no detectable islet  
10 autoantibodies. Samples from subjects older than one year and post seroconversion were  
11 removed.

12           The second published dataset used here was previously described by Avershina et al.  
13 (17). The dataset comprised of amplified and sequenced 16S rRNA genes from vaginal swab  
14 samples collected from a cohort of 256 pregnant women. These subjects were randomized to  
15 receive a daily dose of fermented milk containing probiotic bacterial strains, or milk without  
16 probiotics. An OTU table with 3,000 reads per sample and the accompanying metadata were  
17 kindly provided by the corresponding author. This table was used in all downstream  
18 bioinformatics and statistical analysis. Only those samples collected at the 36<sup>th</sup> week of  
19 gestation were used in these analyses.

20           The third previously published dataset comprised of 16S rRNA gene sequences from the  
21 V1-V3 hypervariable region downloaded from the NIH Human Microbiome Project  
22 (<https://www.hmpdacc.org/HMQCP/#data>). The final OTU table processed by Qiime (9) using an  
23 OTU-clustering strategy and accompanying metadata were obtained and loaded into the R  
24 environment. After removing singletons, only saliva and left antecubital fossa samples were  
25 kept. The final dataset comprised of 113 saliva samples and 59 left antecubital fossa samples  
26 all rarefied at 2,000 sequences pre sample. A record of all statistical analyses comparing the  
27 datasets with and without using PIME including the R-code and results is included in  
28 Supplementary File S3.

29

30

31   **Performance of PIME compared against other filtering methods**



1           The results comparing the performance of PIME with other filtering methods are  
2 presented in Figure 2. After quality filtering the saliva dataset, a total of 4,981,638 high-quality  
3 paired sequences, 400 bp long, were obtained from all subjects. An average 44,258 reads per  
4 sample were obtained. The dataset was rarefied to 24,900 reads per sample in all analyses  
5 commensurate with the lowest number of reads found in any one sample. This number of reads  
6 was sufficient to accurately reflect the microbial diversity in these samples given the low  
7 complexity of saliva samples. The best prevalence interval calculated by PIME was at 65%. This  
8 prevalence interval was used to compare the performance of PIME against the other filtering  
9 methods. The original dataset, without any filtering, presented 4,555 taxa and a total of  
10 3,112,500 sequences after rarefaction. Both prevalence overall and PIME excluded the highest  
11 proportion of ASVs and sequences while filtering by abundance or variance excluded only 78%  
12 of ASVs and kept 99.9% of the reads. Nevertheless, the overall prevalence kept 84% of the  
13 sequences while PIME kept 68% of the total number of sequences. Without using the PIME  
14 filtering the OOB error obtained while attempting to classify the salivary microbe according to  
15 the three diet categories was 44% indicating the model had low accuracy in predicting diet  
16 according to the microbiota. Overall prevalence, abundance and variance filtering also  
17 presented low accuracy in classifying diet according to the microbiota however, after PIME  
18 filtering the accuracy of the model increased to 100%.

19

20

## 21 **PIME application and effectiveness**

22           Different datasets were used to validate the PIME workflow. The computations of the  
23 OOB error rate from random forests, the number of taxa and the number of remaining  
24 sequences for each prevalence interval from the diet-saliva dataset are presented in Table 1.  
25 Stringent criteria for definition of prevalence lead to greater improvement in accuracy for  
26 predicting diet based on the salivary microbiota. The prevalence interval of 65% provided the  
27 best separation of microbial communities (OOB error = zero) while still including the majority of  
28 the sequences in the analysis. This prevalence interval was chosen for further analysis, but  
29 other intervals of prevalence can also be tested. For instance, the prevalence interval of 25%  
30 had OOB error of 7.2%. This indicates that the model is 92.8% accurate, which is a reasonably  
31 good model and keep 88% of sequences. The importance of each ASV in finding microbiome

1 differences among diet categories (high, medium, or low diet categories) for the prevalence  
2 interval of 65% is presented in Table 2. The table indicates the ability of each variable to classify  
3 the microbes according to the three diet categories. The ASVs are ordered as most- to least-  
4 important. The more the accuracy of the random forest decreases due to the exclusion of a  
5 single ASV, the more important that variable is, and therefore variables with a large mean  
6 decrease in accuracy are more important for classification of the ASVs according to diet. The  
7 mean decrease accuracy of the unfiltered dataset presented negative values, which are a clear  
8 warning sign the model might be overfitting noise (Table 2). On the other hand, after PIME  
9 filtering, the mean decrease accuracy values were all positive indicating a true contribution of  
10 each ASV to classify diet according to the microbiota. Altogether, the results indicated that after  
11 PIME filtering differences in the saliva microbiome was partially explained by diet rather than by  
12 random distribution patterns. The traditional approach, not accounting for microbial prevalence,  
13 was unable to distinguish these differences.

14       Following this first test, 16S rDNA data from stool of 76 children at high genetic risk for  
15 type 1 diabetes (16) were tested for prevalence differences in those samples from children who  
16 remained healthy versus those that became autoimmune. The computations of the OOB error  
17 rate from random forests, the number of taxa and the number of remaining sequences for each  
18 prevalence interval from the dataset described by Davis-Richardson *et al.* (2014) are presented  
19 in Table 3. PIME was able to calculate prevalence interval up to 70%. At prevalence intervals  
20 higher than 70% samples had zero counts and prevalence was not calculated. As expected, the  
21 OOB error rate decreased with higher prevalence intervals. At 60% prevalence interval the OOB  
22 error was zero and the number of remaining sequences was 1,165,304. The importance of each  
23 ASV in finding microbiome differences among cases and controls subjects under risk for T1  
24 diabetes for the prevalence interval of 60% is presented in Table 4. Comparing the results  
25 obtained by the unfiltered dataset with the PIME filtered dataset we observe an improvement in  
26 accuracy. Previously, Davis-Richardson *et al.* (2014) discovered that the relative abundance of  
27 *Bacteroides* was significantly higher in autoimmune vs. control subjects. The higher abundance  
28 of *Bacteroides* was confirmed by PIME and other Amplicon Sequence Variants (ASVs)  
29 belonging to *Bifidobacterium* genus were also found associated with autoimmune subjects.

30       In the third dataset tested, taxa were equally likely to be detected in the probiotic and  
31 placebo groups (17). Prevalence testing by PIME also does not capture any difference between

1 treatments (Table 5). As the vaginal environment is dominated by *Lactobacillus*, a severe drop  
2 in the number of sequences at 5% prevalence interval was observed, The OOB error rate of the  
3 overall model obtained by Random Forest analysis suggests that irrespective of the prevalence  
4 interval no distinction between probiotic consumption and placebo exists (Supplementary File  
5 3). Those results confirm the author's previous findings and demonstrate our approach is not  
6 prone to type I errors (finding false positive results).

7 Finally, PIME was tested using the association between saliva microbiome and the left  
8 antecubital fossa, a dataset from the Human Microbiome Project (22). These two distinctive  
9 human microbial habitats were selected as they are expected to harbor very different  
10 communities. As predicted, PIME showed that the microbial habitats tested are very distinct.  
11 The OOB error rate was 0.005 within the original dataset and zero at all prevalence intervals  
12 applied (Table 6) indicating the prevalence filtering does not increase the differentiation between  
13 these very different microbial habitats.

14  
15

## 16 **Likelihood of introducing bias while building prevalence-filtered datasets**

17 The results obtained by the PIME error detection step are presented in Figure 3. The  
18 biological difference among samples is expected to be greater than the differences generated  
19 randomly. This way, as the prevalence interval increases the OOB error might decrease. As  
20 expected, the OOB error rate of samples with true biological relevant differences (Figures 3A,  
21 3B and 3D) decreased (or remained constant in low noise datasets – Figure 3D) with the  
22 increase in the prevalence interval definition. On the other hand, random sampling produced  
23 OOB error rate always higher than those obtained based on the original dataset. In datasets  
24 with no expected biological relevant differences (Figure 3C), the OOB error did not decrease  
25 with higher prevalence interval definitions and the randomized dataset produced higher OOB  
26 error rates. Thus, the signal to noise ratio increases with the prevalence intervals generating low  
27 OOB error rate values while no improvements in accuracy are observed within the randomized  
28 datasets. This error detection analysis showed that no bias was introduced while building  
29 prevalence-filtered datasets confirming this workflow is not prone to type I errors.

30  
31

## 1 CONCLUSIONS

2

3 Prevalence is a key epidemiological concept involving the counting of the number of  
4 people affected by a disease (23, 24). PIME was designed based on this concept. Here we  
5 argue the importance of a microbial community found in a single sample is smaller than if the  
6 same community is present in the majority of samples. Under such rationale, we designed a  
7 workflow capable of improving the ability to detect important organisms as it considers the  
8 extent to which an organism is present across a given population, which may be masked when  
9 only relative abundance is considered. Challenges in microbiome data include sparsity  
10 (presence of many zeros) and large variance in distribution patterns (also known as over-  
11 dispersion) with prominent abundance of some microbes in some subjects/samples and nearly  
12 absence in others (4, 25). The current major challenge for using this information is indubitably  
13 how to convert it into rational biological conclusions providing control for error rates of false  
14 discoveries. Many tools have been successfully developed aiming to contrast experimental  
15 factors but they usually only take into account the microbial abundance and/or  
16 presence/absence. Thus, PIME is expected surpass those challenges including the concept of a  
17 per treatment microbial prevalence in the analysis. This approach greatly improves the results  
18 by removing interpersonal variation within groups (unique microbes found in a single  
19 subject/sample) and keeping only microbes found in most of the subjects of a population (likely  
20 to be associated with a experimental variable). This approach reveals microbes important in a  
21 disease that may be overlooked by traditional methods leading to a greater understanding of  
22 pathogenesis and the identification of potential probiotic treatment and prevention strategies.

23 Several tools designed to support microbiome statistical data analysis include data  
24 filtering as one of the first steps. The most commonly used filtering includes the exclusion of low  
25 count features (low abundance) using a minimum, yet arbitrary, cutoff, low variance (assuming  
26 that features under low variance are very unlikely to be significant in the comparative analysis)  
27 and low overall prevalence. Arguably filtering those uninformative taxa can improve the data  
28 sparsity issue, improving statistical power. Here we compare the performance of PIME with  
29 these other filtering methods. PIME outperformed all of those other approaches reducing the  
30 error rate and detecting microbial community differences where none were seen by other  
31 methods. To illustrate the application and the value of PIME, it was also implemented in a

1 variety of 16S rRNA datasets. Within all of our tests we confirmed previous findings and  
2 improved the results.

3         During the course of analysis and tests we also detected some potential limitations of  
4 PIME. As PIME relies strongly on group prevalence, it is sensitive to the quality of sample  
5 groups. Poorly categorized groups made up of subjects/samples with very different microbial  
6 composition might affect the prevalence computations and therefore PIME might not be as  
7 effective in suggesting a good prevalence interval for filtering. For datasets with very large  
8 number of samples, PIME might not find a clear prevalence interval for data filtering. With  
9 increased number of samples, the chance of sampling different “cores” or subpopulations is also  
10 increased. In addition, when there is large heterogeneity within sample groups, coupled with  
11 high data sparsity, prevalence computation might not be successful. Another possible limitation  
12 of PIME rises from random forests method, wrapped in `pime.oob.error` and  
13 `pime.best.prevalence` functions. Random forests models are sensitive to multicollinear variables  
14 when informing variable importance, though it doesn’t affect prediction errors. Colinear variables  
15 might have inaccurate importance values as the difference is explained by the, randomly, first  
16 chosen variable and little information is added to the model after this.

17

18

19

## 20 **Acknowledgements**

21 L.F.W.R. and P.C.T.D. were supported by Conselho Nacional de Desenvolvimento Científico e  
22 Tecnológico (CNPq) and Coordenação de Aperfeiçoamento de Pessoal de Nível Superior  
23 (CAPES), respectively. The work was supported by grants to E.W.T. from NIH (5R21AI120195-  
24 02) and JDRF (1-INO-2018-637-A-N).

25

## 26 **Availability and implementation**

27 The R package, installation instructions and a step-by-step example on how to use PIME are  
28 freely available at: <https://github.com/microEcology/PIME>.

29

1 **Table 1.** Computations of the out-of-bag error rate from random forests, number of taxa and  
2 number of remaining sequences for each prevalence interval from the diet-saliva dataset.

| Prevalence Interval | OOB error rate (%) | Number of OTUs | Number of seqs. |
|---------------------|--------------------|----------------|-----------------|
| 0.05                | 44.8               | 1,158          | 2,915,670       |
| 0.10                | 34.4               | 627            | 2,797,858       |
| 0.15                | 24                 | 448            | 2,715,217       |
| 0.20                | 16.8               | 327            | 2,653,319       |
| 0.25                | 7.2                | 235            | 2,587,433       |
| 0.30                | 7.2                | 196            | 2,547,536       |
| 0.35                | 2.4                | 169            | 2,479,055       |
| 0.40                | 0.8                | 151            | 2,438,026       |
| 0.45                | 1.6                | 130            | 2,383,250       |
| 0.50                | 1.6                | 104            | 2,302,147       |
| 0.55                | 1.6                | 91             | 2,264,871       |
| 0.60                | 0.8                | 84             | 2,222,431       |
| 0.65                | 0                  | 76             | 2,120,215       |
| 0.70                | 0                  | 66             | 1,972,958       |
| 0.75                | 0                  | 53             | 1,824,764       |
| 0.80                | 0.8                | 43             | 1,747,231       |
| 0.85                | 0                  | 34             | 1,612,451       |
| 0.90                | 0                  | 26             | 1,351,690       |
| 0.95                | 0                  | 17             | 1,078,200       |

3  
4

1 **Table 2.** Importance of ASVs measured by mean decrease accuracy to differentiate the three  
 2 diet categories (High, Low and Medium) from the diet-saliva dataset.

| <b>Mean Decrease Accuracy</b> |            |               |                         |                            |
|-------------------------------|------------|---------------|-------------------------|----------------------------|
| <b>High</b>                   | <b>Low</b> | <b>Medium</b> | <b>Over all classes</b> | <b>Genus</b>               |
| Unfiltered Dataset            |            |               |                         |                            |
| 0.0001                        | 0.0002     | -0.0004       | -0.0002                 | <i>Veillonella</i>         |
| 0.0005                        | -0.0001    | 0.0004        | 0.0002                  | <i>Streptococcus</i>       |
| -0.0007                       | -0.0002    | -0.0009       | -0.0007                 | <i>Prevotella_7</i>        |
| 0.0006                        | -0.0013    | 0.0005        | -0.0001                 | <i>Haemophilus</i>         |
| -0.0003                       | -0.0008    | -0.0008       | -0.0007                 | <i>Veillonella</i>         |
| 0.0011                        | -0.0017    | 0.0018        | 0.0007                  | <i>Veillonella</i>         |
| -0.0003                       | -0.0004    | -0.0006       | -0.0005                 | <i>Veillonella</i>         |
| -0.0018                       | -0.0016    | 0.0007        | -0.0005                 | <i>Unclassified Genera</i> |
| 0.0001                        | -0.0006    | -0.0009       | -0.0006                 | <i>Neisseria</i>           |
| 0.0001                        | 0.0002     | -0.0004       | -0.0002                 | <i>Veillonella</i>         |
| Dataset filtered by PIME      |            |               |                         |                            |
| 0.0200                        | 0.0287     | 0.0883        | 0.0573                  | <i>Veillonella</i>         |
| 0.0490                        | 0.0060     | 0.0776        | 0.0504                  | <i>Neisseria</i>           |
| 0.0167                        | 0.0153     | 0.0567        | 0.0364                  | <i>Neisseria</i>           |
| 0.0317                        | 0.0455     | 0.0318        | 0.0349                  | <i>Prevotella_7</i>        |
| 0.0279                        | 0.0345     | 0.0260        | 0.0287                  | <i>Alloprevotella</i>      |
| 0.0236                        | 0.0312     | 0.0278        | 0.0276                  | <i>Prevotella_7</i>        |
| 0.0087                        | 0.0046     | 0.0483        | 0.0273                  | <i>Haemophilus</i>         |
| 0.0200                        | 0.0653     | 0.0027        | 0.0239                  | <i>Porphyromonas</i>       |
| 0.0145                        | 0.0250     | 0.0250        | 0.0228                  | <i>Megasphaera</i>         |
| 0.0188                        | 0.0206     | 0.0233        | 0.0216                  | <i>Selenomonas_3</i>       |

3 Showing only the first 10 hits. A complete table with the 30 most important ASVs is provided in the  
 4 Supplementary File 3.

5  
 6



1 **Table 3.** Computations of the out-of-bag error rate from random forests, number of taxa  
2 and number of remaining sequences for each prevalence interval from the dataset  
3 described by Davis-Richardson *et al.* (2014)  
4

| Prevalence Interval | OOB error rate (%) | Number of OTUs | Number of seqs. |
|---------------------|--------------------|----------------|-----------------|
| 0.05                | 13.17              | 979            | 3,152,779       |
| 0.10                | 10.64              | 556            | 2,975,527       |
| 0.15                | 6.16               | 431            | 2,891,465       |
| 0.20                | 3.64               | 335            | 2,773,432       |
| 0.25                | 3.36               | 258            | 2,556,564       |
| 0.30                | 2.8                | 219            | 2,457,867       |
| 0.35                | 2.24               | 175            | 2,339,966       |
| 0.40                | 2.24               | 143            | 2,119,062       |
| 0.45                | 1.4                | 115            | 1,922,701       |
| 0.50                | 2.52               | 99             | 1,733,801       |
| 0.55                | 1.12               | 74             | 1,357,557       |
| 0.60                | 0                  | 62             | 1,165,304       |
| 0.65                | 0.28               | 49             | 1,026,879       |
| 0.70                | 0.56               | 39             | 897,367         |

5  
6  
7  
8  
9

1 **Table 4.** Importance of ASVs measured by mean decrease accuracy to differentiate the cases  
 2 and controls at high genetic risk for type 1 diabetes from the dataset described by Davis-  
 3 Richardson *et al.* (2014).

| <b>Mean Decrease Accuracy</b> |              |                         |                        |
|-------------------------------|--------------|-------------------------|------------------------|
| <b>Controls</b>               | <b>Cases</b> | <b>Over all classes</b> | <b>Genus</b>           |
| Unfiltered Dataset            |              |                         |                        |
| 0.0028                        | 0.0061       | 0.0040                  | <i>Bacteroides</i>     |
| 0.0031                        | 0.0033       | 0.0031                  | <i>Bacteroides</i>     |
| 0.0011                        | 0.0036       | 0.0020                  | <i>Bacteroides</i>     |
| 0.0037                        | 0.0017       | 0.0030                  | <i>Bacteroides</i>     |
| 0.0006                        | 0.0012       | 0.0008                  | <i>Bacteroides</i>     |
| 0.0012                        | 0.0003       | 0.0008                  | <i>Bacteroides</i>     |
| 0.0025                        | 0.0020       | 0.0023                  | <i>Bacteroides</i>     |
| 0.0021                        | 0.0015       | 0.0019                  | <i>Bacteroides</i>     |
| 0.0028                        | 0.0047       | 0.0035                  | <i>Bacteroides</i>     |
| 0.0005                        | 0.0008       | 0.0006                  | <i>Bifidobacterium</i> |
| Dataset filtered by PIME      |              |                         |                        |
| 0.0588                        | 0.0148       | 0.0422                  | <i>Bacteroides</i>     |
| 0.0470                        | 0.0119       | 0.0339                  | <i>Bacteroides</i>     |
| 0.0386                        | 0.0118       | 0.0284                  | <i>Bifidobacterium</i> |
| 0.0372                        | 0.0073       | 0.0260                  | <i>Bifidobacterium</i> |
| 0.0375                        | 0.0063       | 0.0257                  | <i>Bacteroides</i>     |
| 0.0366                        | 0.0070       | 0.0255                  | <i>Bacteroides</i>     |
| 0.0356                        | 0.0074       | 0.0251                  | <i>Bacteroides</i>     |
| 0.0372                        | 0.0045       | 0.0251                  | <i>Bacteroides</i>     |
| 0.0366                        | 0.0058       | 0.0250                  | <i>Bacteroides</i>     |
| 0.0346                        | 0.0076       | 0.0245                  | <i>Bacteroides</i>     |

4 Showing only the first 10 hits. A complete table with the 30 most important ASVs is provided in the  
 5 Supplementary File 3.

6  
 7

1 **Table 5.** Computations of the out-of-bag error rate from random forests, number of taxa  
2 and number of remaining sequences for each prevalence interval from the dataset  
3 described by Avershina *et al.*, (2017).

| Prevalence Interval | OOB error rate (%) | Number of OTUs | Number of seqs. |
|---------------------|--------------------|----------------|-----------------|
| 0.05                | 28.06              | 123            | 988,309         |
| 0.10                | 14.93              | 68             | 967,461         |
| 0.15                | 20.90              | 40             | 954,379         |
| 0.20                | 21.19              | 26             | 931,177         |
| 0.25                | 27.46              | 22             | 929,563         |
| 0.30                | 25.67              | 17             | 903,330         |
| 0.35                | 33.73              | 14             | 899,992         |
| 0.40                | 17.91              | 14             | 898,656         |
| 0.45                | 20.00              | 10             | 889,244         |
| 0.50                | 42.69              | 7              | 881,104         |
| 0.55                | 14.63              | 7              | 853,874         |
| 0.60                | 17.01              | 6              | 853,217         |
| 0.65                | 18.21              | 5              | 797,394         |
| 0.70                | 53.73              | 3              | 745,832         |
| 0.75                | 47.16              | 2              | 663,347         |
| 0.80                | 46.57              | 2              | 663,347         |
| 0.85                | 46.87              | 2              | 663,347         |
| 0.90                | 47.16              | 2              | 663,347         |

4  
5  
6

1 **Table 6.** Computations of the out-of-bag error rate from random forests, number of taxa  
2 and number of remaining sequences for each prevalence interval from the Human  
3 Microbiome Project dataset.

| Prevalence Interval | OOB error rate (%) | Number of OTUs | Number of seqs. |
|---------------------|--------------------|----------------|-----------------|
| 0.05                | 0                  | 509            | 190,455         |
| 0.10                | 0                  | 509            | 189,296         |
| 0.15                | 0                  | 509            | 188,555         |
| 0.20                | 0                  | 506            | 188,189         |
| 0.25                | 0                  | 473            | 183,574         |
| 0.30                | 0                  | 421            | 176,217         |
| 0.35                | 0                  | 328            | 161,346         |
| 0.40                | 0                  | 274            | 151,525         |
| 0.45                | 0                  | 234            | 142,112         |
| 0.50                | 0                  | 185            | 129,369         |
| 0.55                | 0                  | 143            | 112,978         |
| 0.60                | 0                  | 118            | 104,474         |
| 0.65                | 0                  | 74             | 82,052          |
| 0.70                | 0                  | 48             | 62,817          |
| 0.75                | 0                  | 34             | 56,457          |
| 0.80                | 0                  | 23             | 46,475          |
| 0.85                | 0                  | 13             | 34,459          |

4  
5  
6  
7  
8  
9

## 1 **Figures Captions**

2

3 **FIGURE 1.** Empirical representation of steps used in PIME. Top panel. Simplified schema  
4 illustrating PIME method with a subset of 12 saliva's microbiome samples. Each sample (red,  
5 yellow and blue circles) is connected to an ASV (white circles) through edges (green). ASVs  
6 observed in more than one sample are connected by at least two edges and are displayed at  
7 the center of the network. ASVs present in only one sample are connected by a single edge and  
8 are displayed at the border of the network. The first step applied by PIME is to split the full  
9 dataset according to the treatments defined by the user. Within this example red, yellow and  
10 blue circles depict three different treatments. At each of the three new groups the low prevalent  
11 ASVs are removed. Finally, the subsets are merged to compose a new filtered dataset used in  
12 the downstream analysis. Bottom panel. Step-by-step representation of PIME workflow and  
13 validation.

14

15 **FIGURE 2.** Performance of PIME compared to other filtering methods. A) Out of Bag error rate  
16 (OOB error rate); B) total number of sequences; C) Total number of ASVs. Prevalence = filter by  
17 overall taxa prevalence in at least 20% of the subjects; Abundance = filter by abundance of at  
18 least 5 sequences; Variance = filter by variance higher than 20%. PIME = filter by prevalence  
19 interval of 65%.

20

21 **FIGURE 3.** Boxplot depicting the PIME error detection step. Red boxes represent the OOB error  
22 rate obtained by randomly shuffling the labels into arbitrary groupings using 100 random  
23 permutations and running `pime.error.prediction` function at each randomization for each  
24 prevalence interval. Black boxes represent the OOB error rate against the 100 replications in  
25 each prevalence interval against the original sampling labels obtained by running  
26 `pime.oob.replicate` function. (A) Original dataset from salivary microbiome samples. (B) Data  
27 from the gut microbial of 76 children at high genetic risk for type 1 diabetes. (C) Data from the  
28 vaginal microbiome of pregnant women randomized to receive milk with or without probiotic  
29 bacterial strains. (D) Data from the microbiome of saliva and left antecubital fossa of healthy  
30 individuals. Boxes span the first to third quartiles; the horizontal line inside the boxes represents

1 the median. Whiskers extending vertically from the boxes indicate variability outside the upper  
2 and lower quartiles, and the circles indicate outliers.

3  
4

## 5 **Table captions**

6 **Table 1.** Computations of the out-of-bag error rate from random forests, number of taxa and  
7 number of remaining sequences for each prevalence interval from the diet-saliva dataset.

8

9 **Table 2.** Importance of ASVs measured by mean decrease accuracy to differentiate the three  
10 diet categories (High, Low and Medium) from the diet-saliva dataset.

11

12 **Table 3.** Computations of the out-of-bag error rate from random forests, number of taxa and  
13 number of remaining sequences for each prevalence interval from the dataset described by  
14 Davis-Richardson *et al.* (2014).

15

16 **Table 4.** Importance of ASVs measured by mean decrease accuracy to differentiate the cases  
17 and controls at high genetic risk for type 1 diabetes from the dataset described by Davis-  
18 Richardson *et al.* (2014).

19

20 **Table 5.** Computations of the out-of-bag error rate from random forests, number of taxa and  
21 number of remaining sequences for each prevalence interval from the dataset described by  
22 (17).

23

24 **Table 6.** Computations of the out-of-bag error rate from random forests, number of taxa and  
25 number of remaining sequences for each prevalence interval from the Human Microbiome  
26 Project dataset.

27

28

## 29 **Supplementary information**

30

31 **Supplementary File S1.** Comparison of PIME with other existing filtering methods.

32 **Supplementary File S2.** The pipeline used to assign 16S rRNA sequences to ASVs.

33 **Supplementary File S3.** Detailed and reproducible description of PIME data analysis.

34

35

## 36 **References**

37 1. Sze, M.A. and Schloss, P.D. (2016) Looking for a Signal in the Noise: Revisiting Obesity and  
38 the Microbiome. *mBio*, **7**.

- 1 2. Salter, S.J., Cox, M.J., Turek, E.M., Calus, S.T., Cookson, W.O., Moffatt, M.F., Turner, P.,  
2 Parkhill, J., Loman, N.J. and Walker, A.W. (2014) Reagent and laboratory contamination  
3 can critically impact sequence-based microbiome analyses. *BMC Biol.*, **12**, 87.
- 4 3. Eisenhofer, R., Minich, J.J., Marotz, C., Cooper, A., Knight, R. and Weyrich, L.S. (2019)  
5 Contamination in Low Microbial Biomass Microbiome Studies: Issues and  
6 Recommendations. *Trends Microbiol.*, **27**, 105–117.
- 7 4. Kraal, L., Abubucker, S., Kota, K., Fischbach, M.A. and Mitreva, M. (2014) The Prevalence of  
8 Species and Strains in the Human Microbiome: A Resource for Experimental Efforts.  
9 *PLoS ONE*, **9**, e97279.
- 10 5. Consortium, H.M.P. (2012) Structure, function and diversity of the healthy human microbiome.  
11 *Nature*, **486**, 207–14.
- 12 6. Huse, S.M., Ye, Y., Zhou, Y. and Fodor, A.A. (2012) A Core Human Microbiome as Viewed  
13 through 16S rRNA Sequence Clusters. *PLoS ONE*, **7**, e34242.
- 14 7. Callahan, B.J., McMurdie, P.J., Rosen, M.J., Han, A.W., Johnson, A.J.A. and Holmes, S.P.  
15 (2016) DADA2: High-resolution sample inference from Illumina amplicon data. *Nat.*  
16 *Methods*, **13**, 581–583.
- 17 8. McMurdie, P.J. and Holmes, S. (2013) phyloseq: An R Package for Reproducible Interactive  
18 Analysis and Graphics of Microbiome Census Data. *PLoS ONE*, **8**, e61217.
- 19 9. Caporaso, J.G., Kuczynski, J., Stombaugh, J., Bittinger, K., Bushman, F.D., Costello, E.K.,  
20 Fierer, N., Peña, A.G., Goodrich, J.K., Gordon, J.I., *et al.* (2010) QIIME allows analysis of  
21 high-throughput community sequencing data. *Nat. Methods*, **7**, 335–336.
- 22 10. Edgar, R.C. (2013) UPARSE: highly accurate OTU sequences from microbial amplicon  
23 reads. *Nat. Methods*, **10**, 996–998.
- 24 11. Meyer, F., Paarmann, D., D’Souza, M., Olson, R., Glass, E., Kubal, M., Paczian, T.,  
25 Rodriguez, A., Stevens, R., Wilke, A., *et al.* (2008) The metagenomics RAST server – a  
26 public resource for the automatic phylogenetic and functional analysis of metagenomes.  
27 *BMC Bioinformatics*, **9**, 386.
- 28 12. Schloss, P.D., Westcott, S.L., Ryabin, T., Hall, J.R., Hartmann, M., Hollister, E.B.,  
29 Lesniewski, R.A., Oakley, B.B., Parks, D.H., Robinson, C.J., *et al.* (2009) Introducing  
30 mothur: Open-Source, Platform-Independent, Community-Supported Software for  
31 Describing and Comparing Microbial Communities. *Appl. Environ. Microbiol.*, **75**, 7537–  
32 7541.
- 33 13. Dhariwal, A., Chong, J., Habib, S., King, I.L., Agellon, L.B. and Xia, J. (2017)  
34 MicrobiomeAnalyst: a web-based tool for comprehensive statistical, visual and meta-  
35 analysis of microbiome data. *Nucleic Acids Res.*, 10.1093/nar/gkx295.
- 36 14. Pollock, J., Glendinning, L., Wisedchanwet, T. and Watson, M. (2018) The Madness of  
37 Microbiome: Attempting To Find Consensus “Best Practice” for 16S Microbiome Studies.  
38 *Appl. Environ. Microbiol.*, **84**.
- 39 15. Breiman, L. (2001) Random forests. *Mach. Learn.*, **45**, 5–32.
- 40 16. Davis-Richardson, A.G., Ardisson, A.N., Dias, R., Simell, V., Leonard, M.T.,  
41 Kemppainen, K.M., Drew, J.C., Schatz, D., Atkinson, M.A., Kolaczowski, B., *et al.* (2014)  
42 *Bacteroides dorei* dominates gut microbiome prior to autoimmunity in Finnish children at  
43 high risk for type 1 diabetes. *Front. Microbiol.*, **5**.
- 44 17. Avershina, E., Slangsvold, S., Simpson, M.R., Storrø, O., Johnsen, R., Øien, T. and Rudi, K.  
45 (2017) Diversity of vaginal microbiota increases by the time of labor onset. *Sci. Rep.*, **7**.
- 46 18. Serra-Majem, L., Ribas, L., Ngo, J., Ortega, R.M., García, A., Pérez-Rodrigo, C. and  
47 Aranceta, J. (2004) Food, youth and the Mediterranean diet in Spain. Development of  
48 KIDMED, Mediterranean Diet Quality Index in children and adolescents. *Public Health*  
49 *Nutr.*, **7**.



- 1 19. Serra-Majem,L., Ribas,L., García,A., Pérez-Rodrigo,C. and Aranceta,J. (2003) Nutrient  
2 adequacy and Mediterranean Diet in Spanish school children and adolescents. *Eur. J.*  
3 *Clin. Nutr.*, **57**, S35–S39.
- 4 20. Quast,C., Pruesse,E., Yilmaz,P., Gerken,J., Schweer,T., Yarza,P., Peplies,J. and  
5 Glöckner,F.O. (2012) The SILVA ribosomal RNA gene database project: improved data  
6 processing and web-based tools. *Nucleic Acids Res.*, **41**, D590–D596.
- 7 21. Lemos,L.N., Fulthorpe,R.R., Triplett,E.W. and Roesch,L.F.W. (2011) Rethinking microbial  
8 diversity analysis in the high throughput sequencing era. *J. Microbiol. Methods*, **86**, 42–  
9 51.
- 10 22. The Human Microbiome Project Consortium (2012) Structure, function and diversity of the  
11 healthy human microbiome. *Nature*. 486:207–214.
- 12 23. Noordzij,M., Dekker,F.W., Zoccali,C. and Jager,K.J. (2010) Measures of Disease  
13 Frequency: Prevalence and Incidence. *Nephron Clin. Pract.*, **115**, c17–c20.
- 14 24. Ward,M.M. (2013) Estimating Disease Prevalence and Incidence Using Administrative Data:  
15 Some Assembly Required. *J. Rheumatol.*, **40**, 1241–1243.
- 16 25. Li,H. (2015) Microbiome, Metagenomics, and High-Dimensional Compositional Data  
17 Analysis. *Annu. Rev. Stat. Its Appl.*, **2**, 73–94.

18

## Split dataset by treatment

Full dataset

Keep most  
prevalent taxa

Prevalence  
filtered dataset

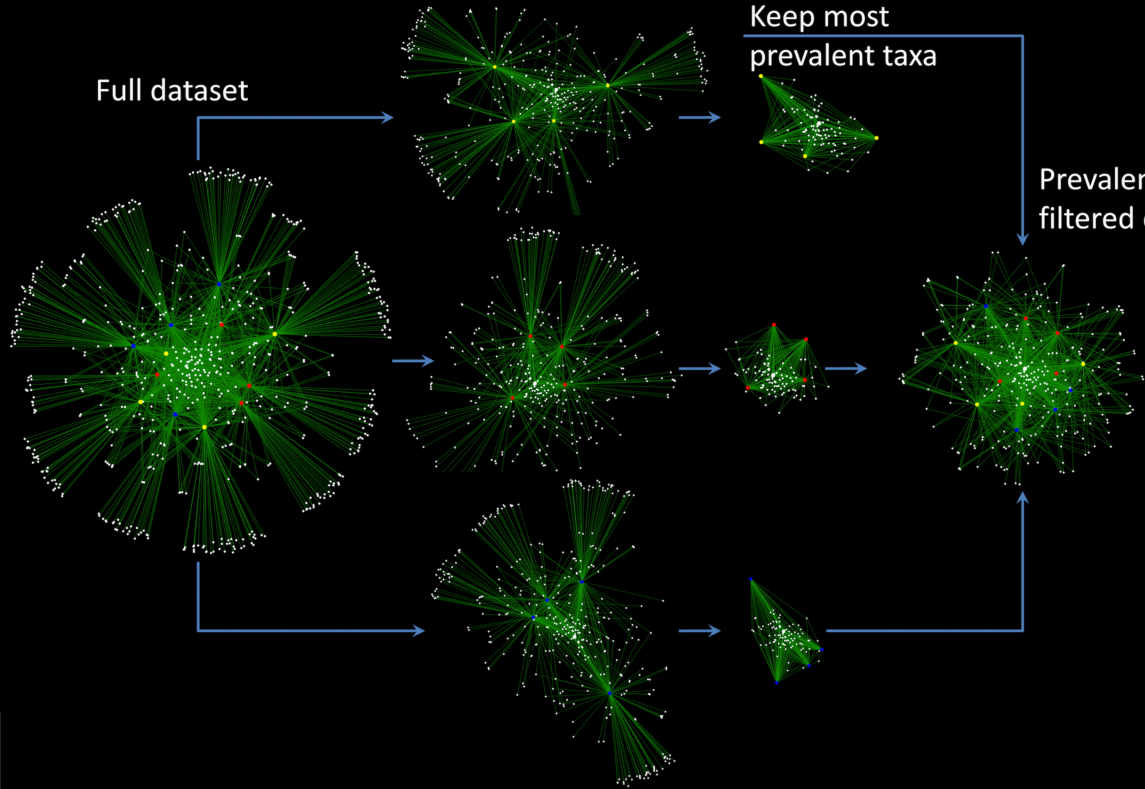

## WORKFLOW

Input  
OTU/ASV table  
and  
Metadata

`pime.oob.error ( )`

Measures the  
error in  
predicting  
microbiome  
differences  
based in the  
original dataset

`pime.split.by.variable ( )`

Splits original data into  
sample groups

`pime.prevalence ( )`

Independently filters  
each sample group for  
prevalence intervals  
(5%, 10%...), merging  
the resulting data by  
sample group and  
prevalence interval

`pime.best.prevalence ( )`

Builds random forests for  
classification, group  
prediction, and computes  
variable (OTU/ASV)  
importance, Mean  
Decrease Accuracy overall  
and for each variable

## VALIDATION

`pime.oob.replicate ( )`

Computes Out of Bag  
error of all prevalence  
intervals (true data) n  
times, and returns a  
table with OOB error  
values and a boxplot.

`pime.error.prediction ( )`

For each prevalence interval, it  
randomizes sample groups n  
times. For each n it splits data  
into the random groups,  
computes prevalence, merge  
data and computes the Out of  
Bag error.

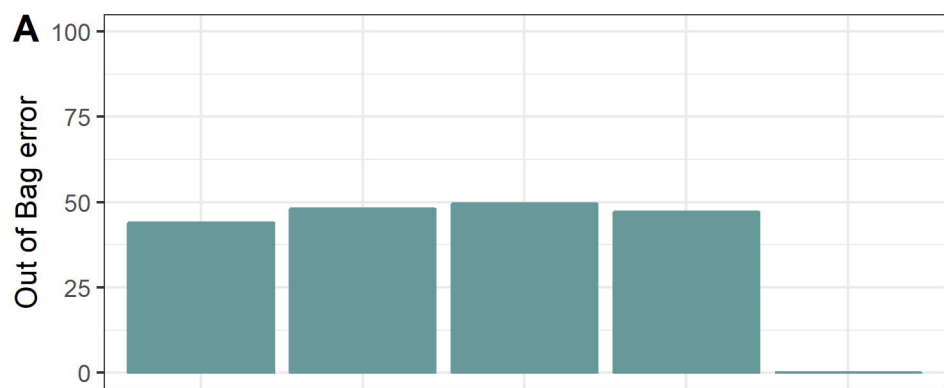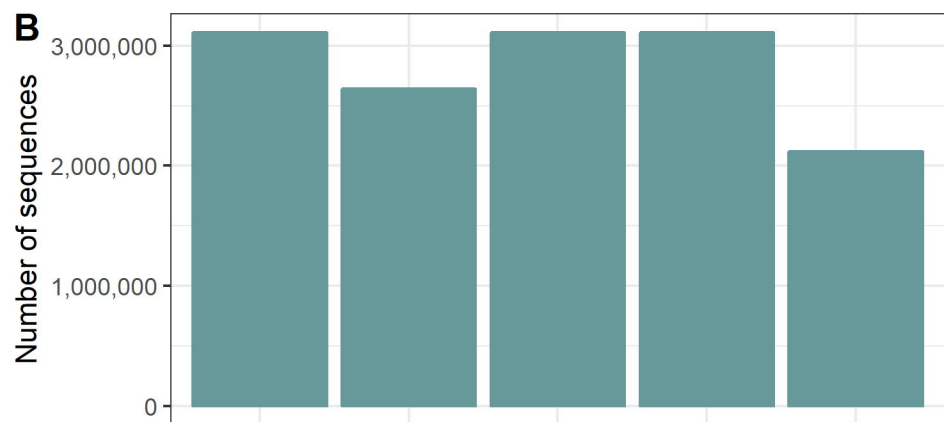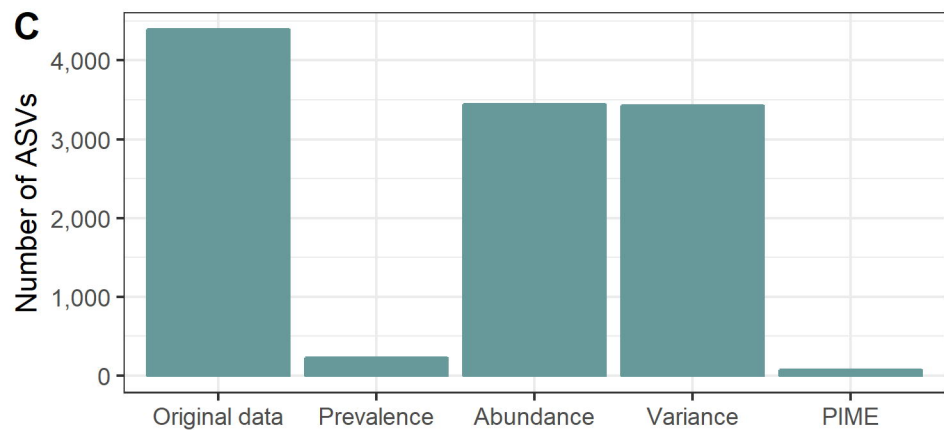

Out of Bag errors  Original Data  Randomized Data

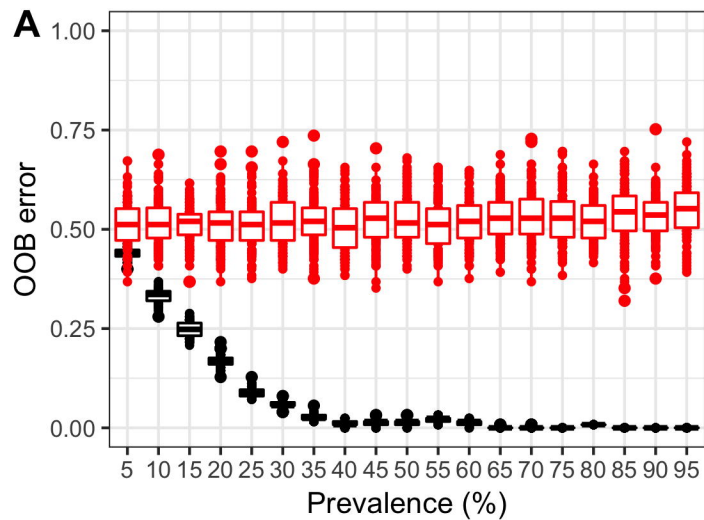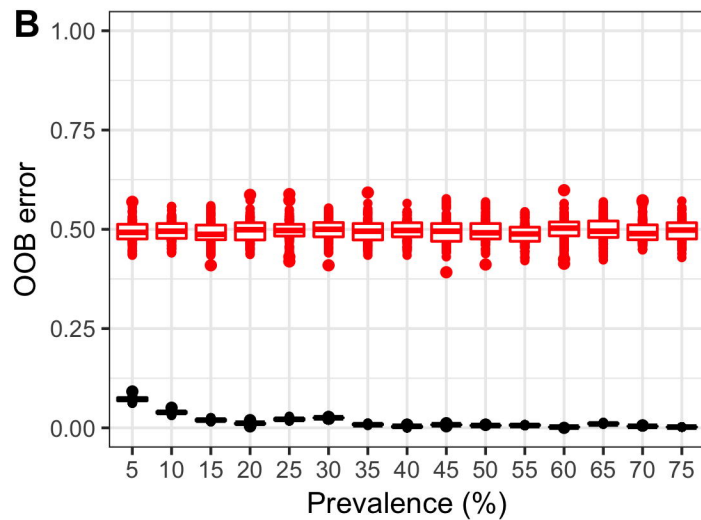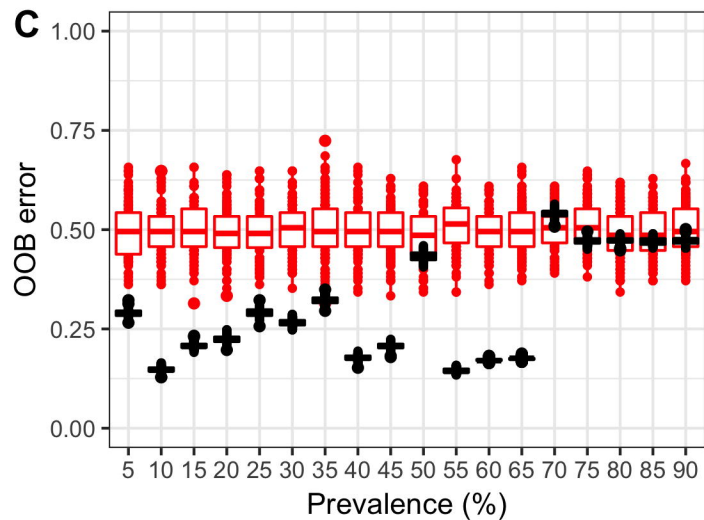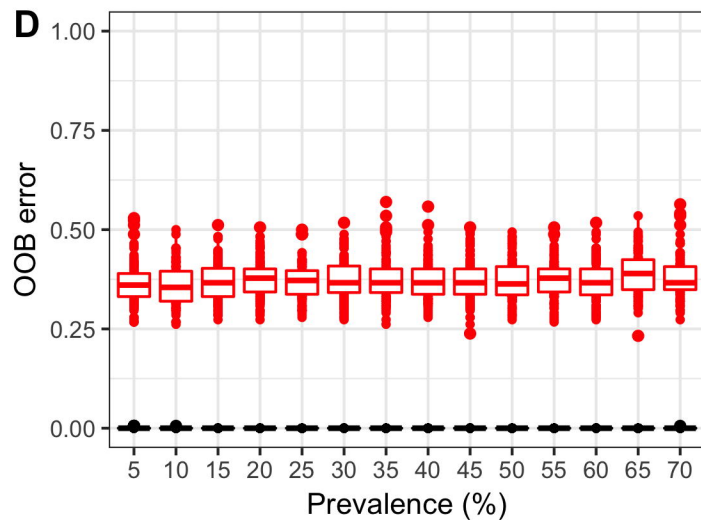

Source: https://www.biorxiv.org/content/10.1101/632182v1.full.pdf
